# Supplementary material for: miRNA Mediated Regulation and Interaction between Plants and Pathogens
Source: PubMed Central journal article supplement (PMC7999934; doi:10.3390/ijms22062913), 2021-03-13
Supplement: ijms-22-02913-s001.pdf [file ijms-22-02913-s001.pdf]

**Supplementary Table 1** Summary of regulation patterns of disease-related miRNAs in different plants

| miRNA                      | Targets                                     | Pathogens                                                | Plant                                            | References |
|----------------------------|---------------------------------------------|----------------------------------------------------------|--------------------------------------------------|------------|
| <b>Positive regulation</b> |                                             |                                                          |                                                  |            |
| miR863-3p                  | <i>ARLPK1, ARLPK2</i><br>, <i>SERRATE</i>   | B: <i>Pseudomonas syringae</i>                           | <i>Arabidopsis thaliana</i>                      | [65]       |
| miR393                     | F-box auxin receptors                       | B: <i>Pseudomonas syringae</i>                           | <i>Arabidopsis thaliana</i>                      | [31]       |
| miR393b*                   | <i>MEMB12</i>                               | B: <i>Pseudomonas syringae</i>                           | <i>Arabidopsis thaliana</i>                      | [37]       |
| miR393                     | auxin receptors                             | O: <i>Hyaloperonospora arabidopsidis</i>                 | <i>Arabidopsis thaliana</i>                      | [66]       |
| miR161                     | <i>PPR</i>                                  | O: <i>Phytophthora capsici</i>                           | <i>Arabidopsis thaliana</i>                      | [45]       |
| osa-miR398b                | <i>CDS1, CDS2, CCSD, SODX</i>               | F: <i>Magnaporthe oryzae</i>                             | Rice ( <i>Oryza sativa</i> )                     | [36]       |
| osa-miR160                 | ARF TF: <i>ARF16</i>                        | F: <i>Magnaporthe oryzae</i>                             | Rice ( <i>Oryza sativa</i> )                     | [67]       |
| osa-miR7695                | <i>OsNramp6</i>                             | F: <i>Magnaporthe oryzae</i>                             | Rice ( <i>Oryza sativa</i> )                     | [68]       |
| miR166k-166h               | ethylene-insensitive 2 gene ( <i>EIN2</i> ) | F: <i>Magnaporthe oryzae</i> ; <i>Fusarium fujikuroi</i> | Rice ( <i>Oryza sativa</i> )                     | [69]       |
| PN-2013                    | <i>TaMDHAR</i>                              | <i>Puccinia striiformis</i> f. sp. <i>tritici</i> (Pst)  | Wheat ( <i>Triticum aestivum</i> )               | [70]       |
| Can-miRn37a                | ethylene response factors (ERF)             | F: <i>Colletotrichum truncatum</i>                       | Chilli ( <i>Capsicum annum</i> )                 | [34]       |
| ghr-miR477                 | <i>GhCBP60A</i>                             | F: <i>Verticillium dahliae</i>                           | Cotton ( <i>Gossypium hirsutum</i> )             | [71]       |
| gh-miR159                  | <i>HiC-15</i>                               | F: <i>Verticillium dahliae</i>                           | Cotton ( <i>Gossypium hirsutum</i> )             | [43]       |
| gh-miR166                  | <i>Clp-1</i>                                | F: <i>Verticillium dahliae</i>                           | Cotton ( <i>Gossypium hirsutum</i> )             | [43]       |
| miR156                     | TFs                                         | F: <i>Botryosphaeria dothidea</i>                        | <i>Populus trichocarpa</i>                       | [72]       |
| miR1448                    | NBS-LRR                                     | F: <i>B. dothidea</i>                                    | <i>Populus trichocarpa</i>                       | [72]       |
| miR164                     | NBS-LRR                                     | F: <i>B. dothidea</i>                                    | <i>Populus trichocarpa</i>                       | [72]       |
| miR472a                    | NBS-LRR                                     | F: <i>Cytospora chrysosperma</i>                         | <i>Populus alba</i> × <i>P. glandulosa</i> (84K) | [23]       |
| miR172a/b                  | AP2/ERF                                     | O: <i>Phytophthora</i>                                   | Tomato ( <i>Solanum</i> )                        | [73]       |

|                            |                                           | <i>infestans</i>                                                                                                                 | <i>lycopersicum</i> )                                                 |      |
|----------------------------|-------------------------------------------|----------------------------------------------------------------------------------------------------------------------------------|-----------------------------------------------------------------------|------|
| <b>Negative regulation</b> |                                           |                                                                                                                                  |                                                                       |      |
| miR396                     | GRF                                       | F: <i>Plectosphaerella cucumerina</i> ; <i>Botrytis cinerea</i> ; <i>Fusarium oxysporum</i> ; <i>Colletotrichum higginsianum</i> | <i>Arabidopsis thaliana</i>                                           | [74] |
| ath-miR164c                | <i>AtP5CS1</i>                            | B: <i>P. syringae</i>                                                                                                            | <i>Arabidopsis thaliana</i>                                           | [75] |
| miR164                     | <i>NAC4</i><br>(At5g07680)                | B: <i>Alternaria brassicicola</i> ; <i>Pseudomonas syringae</i> ; flg22                                                          | <i>Arabidopsis thaliana</i>                                           | [76] |
| miR394                     | <i>LEAF CURLING RESPONSIVENE SS (LCR)</i> | F: <i>Botrytis cinerea</i>                                                                                                       | <i>Arabidopsis thaliana</i>                                           | [77] |
| miR393                     | auxin receptors                           | B: <i>Alternaria brassicicola</i>                                                                                                | <i>Arabidopsis thaliana</i>                                           | [66] |
| miR398b                    | CSD1, CSD2                                | B: <i>Pseudomonas syringae pv tomato DC3000</i>                                                                                  | <i>Arabidopsis thaliana</i>                                           | [78] |
| miR825*                    | TIR-NBS-LRR                               | F: <i>Botrytis cinerea</i>                                                                                                       | <i>Arabidopsis thaliana</i>                                           | [39] |
| miR5819                    | CPuORF3-OsbZI P38                         | F: <i>Magnaporthe oryzae</i>                                                                                                     | Rice ( <i>Oryza sativa</i> )                                          | [79] |
| miRNA5075                  | CPuORF4-OsbZI P27                         | F: <i>Magnaporthe oryzae</i>                                                                                                     | Rice ( <i>Oryza sativa</i> )                                          | [79] |
| miRNA2101                  | CPuORF7-SAM decarboxylase                 | F: <i>Magnaporthe oryzae</i>                                                                                                     | Rice ( <i>Oryza sativa</i> )                                          | [79] |
| miR168                     | AGO1, AGO18                               | viruliferous (RSV and RDV-carrying) insects                                                                                      | Rice ( <i>Oryza sativa</i> )                                          | [80] |
| miR169                     | nuclear factor Y-A (NF-YA)                | F: <i>Magnaporthe oryzae</i>                                                                                                     | Rice ( <i>Oryza sativa</i> )                                          | [81] |
| miRNA528                   | L-ascorbate oxidase (AO)                  | rice stripe virus (RSV)                                                                                                          | Rice ( <i>Oryza sativa</i> )                                          | [35] |
| miR159                     | <i>GAMYB</i>                              | O: <i>Phytophthora parasitica</i>                                                                                                | Rice ( <i>Oryza sativa</i> ) and Tobacco ( <i>Nicotiana tabacum</i> ) | [82] |
| nta-miR6019                | NB-LRR                                    | tobacco mosaic virus (TMV)                                                                                                       | Tobacco ( <i>Nicotiana tabacum</i> )                                  | [27] |

|                   |                      |                                                            |                                                    |      |
|-------------------|----------------------|------------------------------------------------------------|----------------------------------------------------|------|
| nta-miR6020       | NB-LRR               | tobacco mosaic virus (TMV)                                 | Tobacco ( <i>Nicotiana tabacum</i> )               | [27] |
| tae-miR164        | TaNAC21/22           | F: <i>Puccinia striiformis</i> f. sp. <i>tritici</i> (Pst) | Wheat ( <i>Triticum aestivum</i> )                 | [83] |
| miR408b           | -                    | F: <i>Fusarium verticillioides</i>                         | Maize ( <i>Zea mays</i> )                          | [84] |
| stu-miR482e       | NBS-LRR              | F: <i>Verticillium dahliae</i>                             | Potato ( <i>Solanum tuberosum</i> )                | [20] |
| miR482<br>miR2118 | NBS-LRR              | F: <i>Pseudomonas syringae</i>                             | Tomato ( <i>Solanum lycopersicum</i> )             | [5]  |
| slmiR482e-3p      | NBS-LRR              | F: <i>Fusarium oxysporum</i>                               | Tomato ( <i>Solanum lycopersicum</i> )             | [85] |
| slmiR482f         | NB-LRR               | F: <i>F. oxysporum</i>                                     | Tomato ( <i>Solanum lycopersicum</i> )             | [22] |
| slmiR5300         | NB-LRR               | F: <i>F. oxysporum</i>                                     | Tomato ( <i>Solanum lycopersicum</i> )             | [21] |
| sly-miR6024       | <i>I2</i> homologues | tomato yellow leaf curve virus (TYLCY)                     | Tomato ( <i>Solanum lycopersicum</i> )             | [86] |
| Md-miRLn11        | <i>Md-NBS</i>        | B: <i>Alternaria alternata</i> f.sp.mali                   | <i>Malus domestica</i> cv. <i>Golden Delicious</i> | [87] |
| miR472a           | NBS-LRR              | F: <i>Colletotrichum gloeosporioides</i>                   | <i>Populus alba</i> × <i>P. glandulosa</i> (84K)   | [23] |

B: bacterium; F: fungus; O: oomycete
